# Supplementary material for: High-throughput sequencing-based profiling of endophytic bacterial community composition and diversity in seeds of Yunnan cytoplasmic male-sterile rice
Source: Research Square preprint supplement (doi:10.21203/rs.3.rs-8614457/v1), 2026-01-29
Supplement: Supplementary file 1 [file 33a543aa756260432a4170a0.docx]

**Highlights**

1. Diverse bacterial communities within Yunnan cytoplasmic male-sterile rice seeds endophytes.
2. Core microbes in Yunnan cytoplasmic male-sterile rice seeds: *Pantoea*, *Xanthomonas*, *Kosakonia*, *Enterobacter*, *Methylobacterium*–*Methylorubrum.*
3. The overall endophytic microbial diversity of Yunnan cytoplasmic male-sterile rice seeds is highly conserved.
